# Supplementary material for: Glycolysis reprogramming in CAFs promotes oxaliplatin resistance in pancreatic cancer through circABCC4 mediated PKM2 nuclear translocation
Source: Springer Nature journal article supplement (doi:10.1038/s41419-025-07431-4), 2025-02-23
Supplement: MOESM1 [file 41419_2025_7431_MOESM1_ESM.pdf]

## Supplementary materials

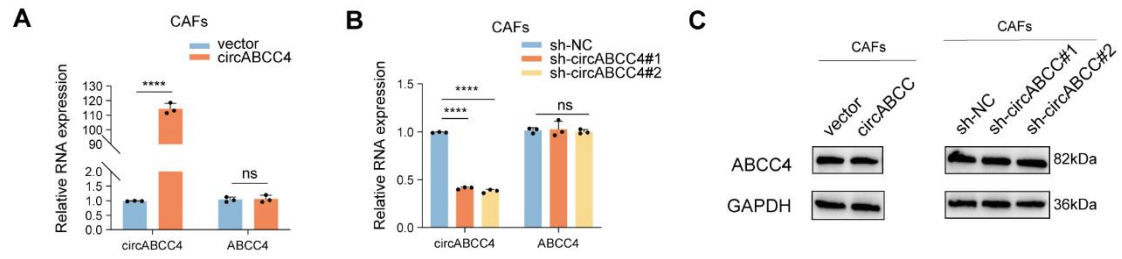

**Figure S1. Specificity of circABCC4 shRNA and overexpression vector, related to Figure 2.**

A-B. qRT-PCR analysis of circABCC4 and ABCC4 expression following transfecting circABCC4 shRNA and overexpression vector in CAFs.

C. Western blot analysis of ABCC4 in CAFs transfected with circABCC4 vector and in CAFs transfected with circABCC4 shRNA.

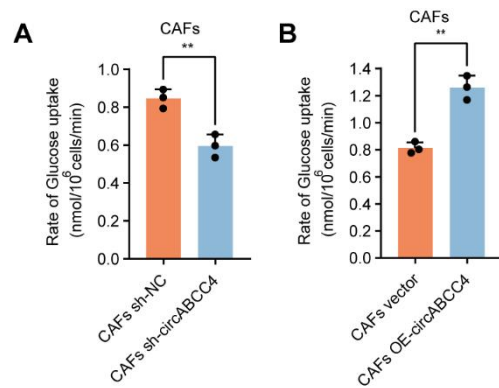

**Figure S2. circABCC4 affects the glycolysis of CAFs, related to Figure 3.**

A-B. The glucose uptake rate of circABCC4-silencing/overexpressing CAFs was monitored.

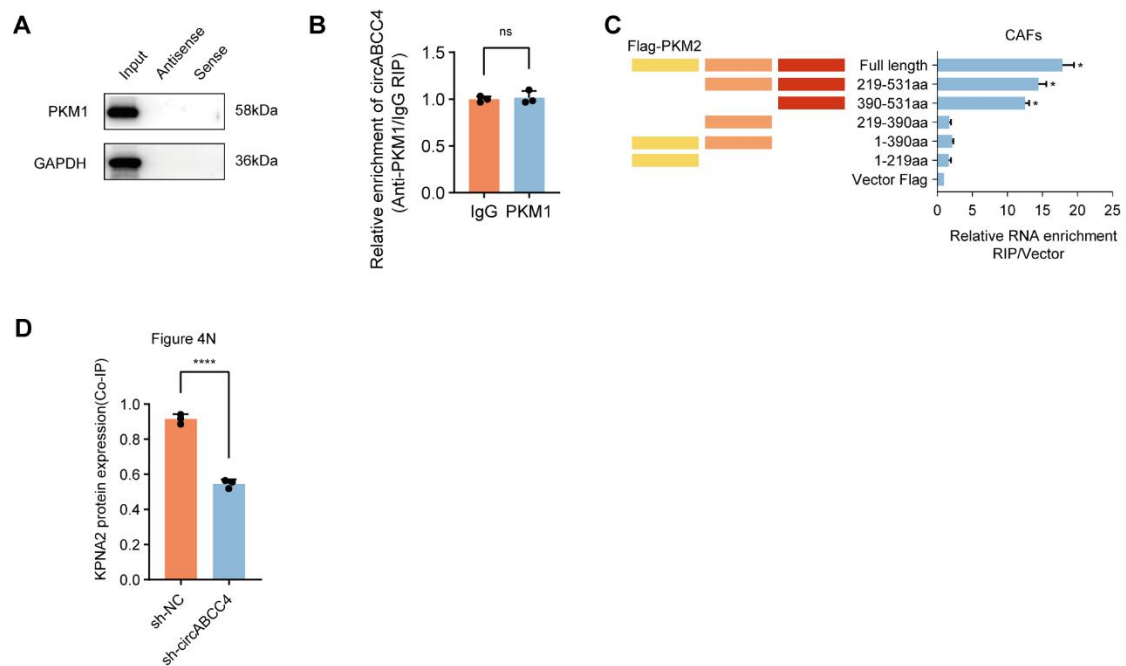

**Figure S3. circABCC4 combined with PKM2 in the specific site.**

A. Western blot analysis of proteins in unique differential bands. PKM1 was not identified as a candidate protein interacting with circABCC4.

B. RNA immunoprecipitation (RIP) assays in CAFs using IgG and PKM1 antibodies. The relative enrichment of circABCC4 was calculated by qRT-PCR.

C. Validation of amino acid sequences in PKM2 that bind to circABCC4. Left panel, diagrams of full-length and truncated Flag-PKM2. Right panel, qRT-PCR analysis after RIP assays of CAFs transfected with full-length and truncated Flag-PKM2.

D. Determination of the gray value of Western Blot strips related to Figure 4N.

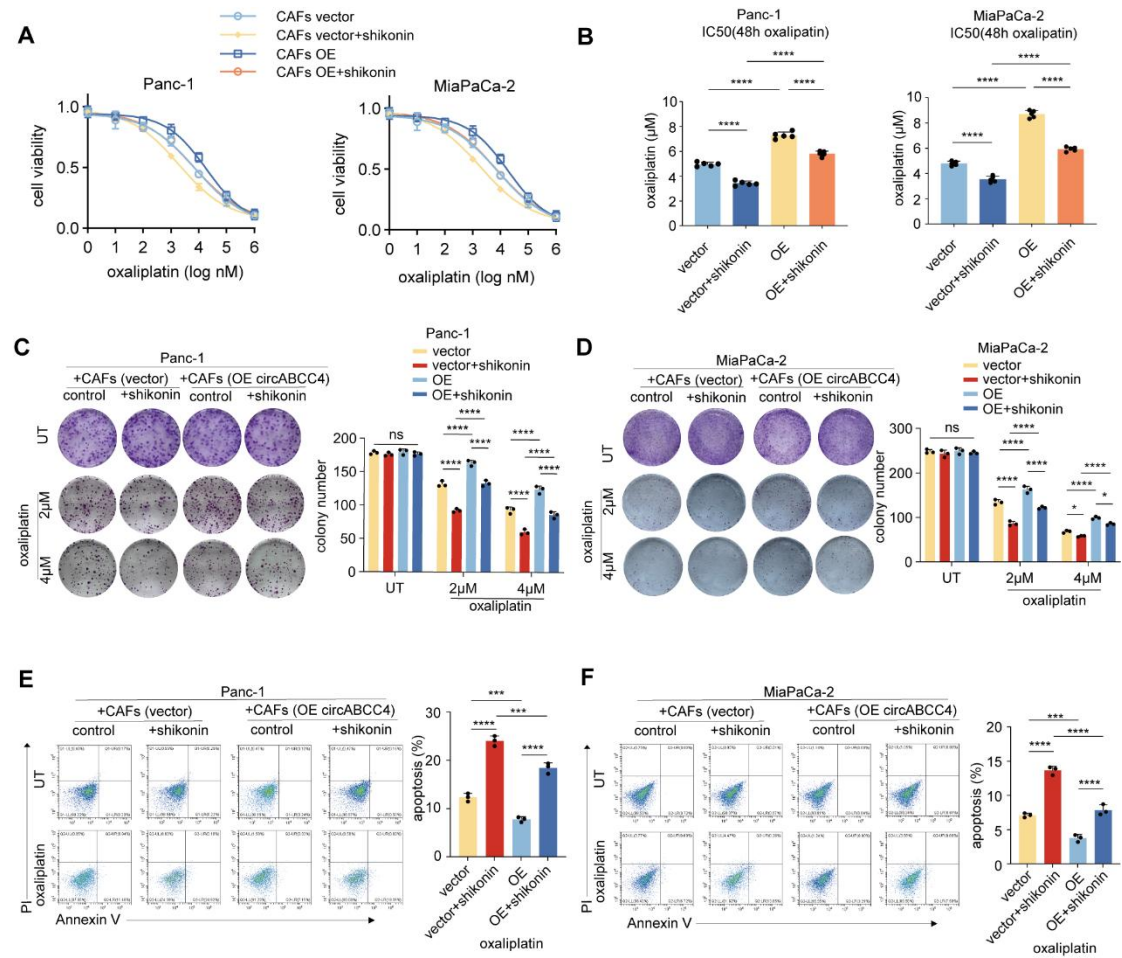

**Figure S4. The inhibition of PDAC cell oxaliplatin resistance while adding shikonin in CAFs, related to Figure 4.**

A-B. Oxaliplatin IC<sub>50</sub> of Panc-1 and MiaPaCa-2 determined by constructing a dose-response curve.

C-D. Colony formation assays of Panc-1 and MiaPaCa-2 cells without or under oxaliplatin treatment (2  $\mu\text{M}$  and 4  $\mu\text{M}$ ).

E-F. Flow cytometry analysis of oxaliplatin-induced (30  $\mu\text{M}$ ) apoptosis in Panc-1 and MiaPaCa-2 cells. Data are expressed as the mean  $\pm$  SD. \*p < 0.05, \*\*p < 0.01, \*\*\*p < 0.001, \*\*\*\*p < 0.0001

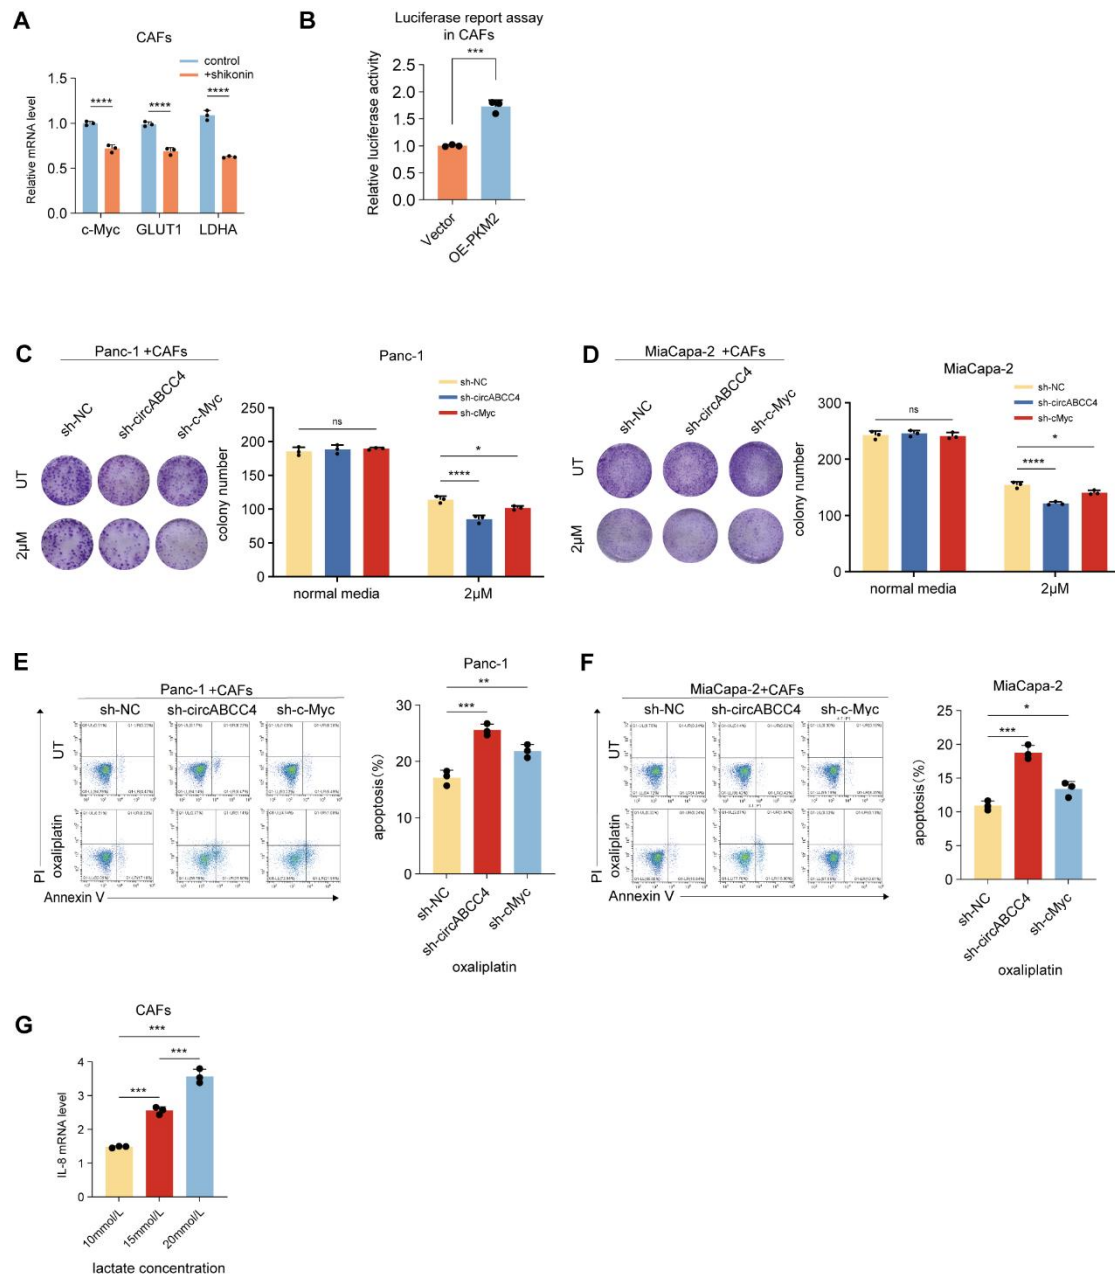

**Figure S5. c-Myc is the downstream of circABCC4 and PKM2, related to Figure 5.**

A. The relative mRNA levels of c-Myc, GLUT1 and LDHA were measured by qPCR in CAFs cells treated with shikonin.

B. Luciferase reporter assays of CAFs transfected with a reporter plasmid containing the c-Myc promoter, and overexpressing PKM2.

C-D. Colony formation assays of Panc-1 and MiaPaCa-2 cells under oxaliplatin treatment or without oxaliplatin.

E-F. Flow cytometry analysis of oxaliplatin-induced (30μM) apoptosis in Panc-1 and MiaPaCa-2 cells. Data are expressed as the mean ± SD. \*p < 0.05, \*\*p < 0.01, \*\*\*p < 0.001, \*\*\*\*p < 0.0001

G. IL-8 production after adding 3 different concentrations of lactate to CAFs.

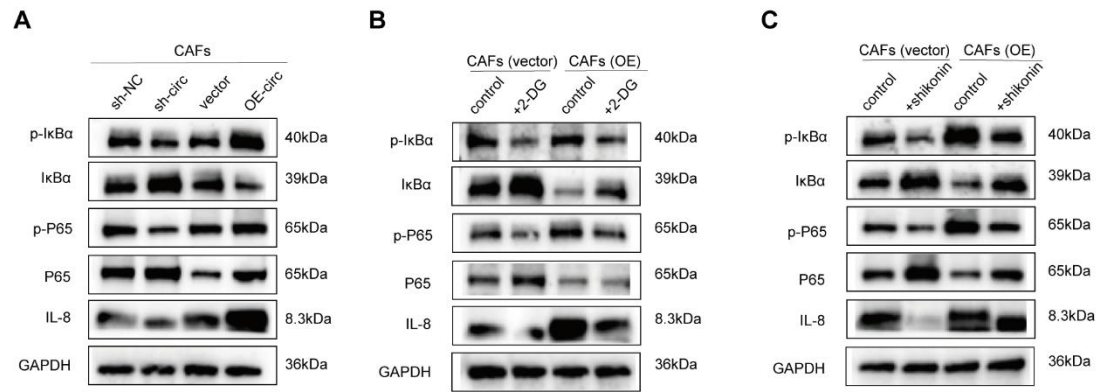

**Figure S6. The activation of NF-κB pathway, related to Figure 5.**

A. Western blot of the expression of p-IκBα, IκBα, p-P65, P65, IL-8 in CAFs transfected with empty vector, circABCC4, lenti-NC-shRNA, or lenti-circABCC4-shRNA.

B-C. Western blot of the expression of p-IκBα, IκBα, p-P65, P65, IL-8 in CAFs transfected with empty vector and circABCC4, as well as treated with 2-DG or shikonin.

**Table S1. primer used in the experiment**

| Gene                     | Sequence (5'-3')       |
|--------------------------|------------------------|
| circABCC4-F (convergent) | AGACCCCAACTCTACAAGGC   |
| circABCC4-R (convergent) | ATTCTTCCATGCACGCTGAC   |
| circABCC4-F (divergent)  | AAGACATTGGACACTTGGATGA |
| circABCC4-R (divergent)  | ACAATTCGCCAGGTCTGACA   |
| GAPDH-F (convergent)     | GTCATCCCTGAGCTGAACGG   |
| GAPDH-R (convergent)     | GTCAAAGGTGGAGGAGTGGG   |
| GAPDH-F (divergent)      | CACCACACTGAATCTCCCCT   |
| GAPDH-R (divergent)      | ATTCCTTCCCGGTTGCAAC    |
| U6-F                     | CTCGCTTCGGCAGCACA      |
| U6-R                     | AACGCTTCACGAATTTGCGT   |
| ABCC4-F                  | GGCAGTGACGCTGTATGG     |
| ABCC4-R                  | CGCCAGGTCTGACAGTAAAG   |
| IL8-F                    | TAGCAAAATTGAGGCCAAGG   |
| IL8-R                    | GGAATTGTGGATCCTGGCTA   |

**Table S2. probes and oligonucleotides used in the experiments**

| Gene                    | Sequence (5'-3')                    | Application |
|-------------------------|-------------------------------------|-------------|
| Cy3-circABCC4           | TTGGGG+TCTCTGA+TGCCTGGA+TGAAA+TCTA  | FISH        |
|                         | A                                   |             |
| double-DIG-circABCC4    | TCTCTGATGCCTGGATGAAATCTA            | ISH         |
| sh-circABCC4#1          | AUCCAGGCAUCAGAGACCCCA               | shRNA       |
| sh-circABCC4#2          | AAGACATTGGACACTTGGATGA              | shRNA       |
| circABCC4 bio-sense     | CTGCCGCTGACGTTTTTAGATTTTCATCCAGGCAT | RNA-Pull    |
|                         | CAGAGACCCCAACTCTACAAGGCC            | down        |
| circABCC4 bio-antisense | GGCCTTGTAGAGTTGGGGTCTCTGATGCCTGGA   | RNA-Pull    |
|                         | TGAAATCTAAAAACGTCAGCGGCAG           | down        |

**Table S3 Antibody used in this study**

| Antibody                               | Application   | Source                  |
|----------------------------------------|---------------|-------------------------|
| ABCC4 Rabbit Polyclonal antibody       | WB, 1:1000    | 27167-1-AP, proteintech |
| Gamma H2A.X Rabbit Polyclonal antibody | WB, 1:5000    | ab81299, abcam          |
|                                        | IF/IHC, 1:250 |                         |
| Lamin B1 Rabbit Monoclonal antibody    | WB, 1:1000    | 17416, CST              |
| Rabbit anti-human Phospho-IκBα         | WB, 1:1000    | 2859, CST               |
| Rabbit anti-human IκBα                 | WB, 1:1000    | 4812, CST               |
| Rabbit anti-human Phospho-NF-κB p65    | WB, 1:1000    | 3033, CST               |
| Rabbit anti-human NF-κB p65            | WB, 1:1000    | 8242, CST               |
| Rabbit anti-human/mouse IL-8           | WB, 1:1000    | 27095-1-AP, proteintech |

|                                       |                         |                                         |
|---------------------------------------|-------------------------|-----------------------------------------|
|                                       | IHC/IF, 1:250           |                                         |
| PKM2-Rabbit Polyclonal antibody       | WB, 1:1000<br>IF, 1:250 | 15822-1-AP, proteintech                 |
| PKM1-Rabbit Polyclonal antibody       | WB, 1:1000              | 15821-1-AP, proteintech                 |
| KPNA2-Rabbit Polyclonal antibody      | WB, 1:1000              | 10819-1-AP, proteintech                 |
| Rabbit anti-human/mouse $\alpha$ SMA  | IF, 1:2000              | 14395-1-AP, proteintech                 |
| GAPDH (MC4) Mouse Monoclonal Antibody | WB, 1:5000              | RM2002, Beijing Ray<br>Antibody Biotech |
| Goat anti-Mouse IgG(H+L)-HRP          | WB, 1:5000              | RM3001, Beijing Ray<br>Antibody Biotech |
| Goat anti-Rabbit IgG(H+L)-HRP         | WB, 1:5000              | RM3002, Beijing Ray<br>Antibody Biotech |
| Goat anti-rabbit Alexa Fluor 488      | IF, 1:250               | ab150077, abcam                         |
